# Supplementary material for: FUSION-Guided Hypothesis Development Leads to the Identification of N6,N6-Dimethyladenosine, a Marine-Derived AKT Pathway Inhibitor
Source: PubMed Central journal article supplement (PMC5367032; doi:10.3390/md15030075), 2017-03-15
Supplement: marinedrugs-15-00075-s001.pdf [file marinedrugs-15-00075-s001.pdf]

## Supplemental Information File

### General NMR, LC-MS and HPLC procedures

<sup>1</sup>H and 2D experiments were recorded at a 600MHz using DMSO-*d*<sub>6</sub> in a Varian spectrometer and chemical shifts were recorded based on the corresponding solvent signal ( $\delta_{\text{H}}$  2.50 ppm for DMSO-*d*<sub>6</sub>).

High resolution ESI-TOF (HRMS) mass spectra were provided by the Scripps Research Institute, La Jolla, CA. Low-resolution LC/ESI-MS data were measured using an Agilent 1200 series LC/MS system -with a reverse-phase C18 column (Phenomenex Luna, 150mm X 4.6 mm, 5  $\mu$ m) at a flow rate of 0.7 mL/min. Semi-preparative HPLC was performed on an Agilent 1200 series, using a C18 column (Phenomenex Luna, 250 mm X 10.0 mm, 5 $\mu$ m).

### Collection and phylogenetic analysis of strain SNA-024

The marine-derived bacterium strain SNA-024 was isolated from a sediment sample collected from West Plana Cay, Bahamas. Bacterial spores were collected via a stepwise centrifugation as follows: 2 g of sediment was dried over 24 hr in an incubator at 35° and the resulting sediment added to 10 mL sH<sub>2</sub>O containing 0.05% Tween 20. After vigorous vortex for 10 min, the sediment was centrifuged at 18000 rpm for 25 min (4° C) and the resulting spore pellet collected. The resuspended spore pellet (4 mL sH<sub>2</sub>O) was plated on an acidified Gause media, giving rise to individual colonies of SNA-024 after 2 weeks. Analysis of the 16S rRNA sequence of SNA-024 revealed 98% identity to *Streptomyces coeruleoaurantiacus*.

### Cultivation and Extraction

Bacterium SNA-024 was cultured in 15 X 2.8 L Fernbach flasks each containing 1 L of seawater-based medium (10 g starch, 4 g yeast extract, 2 g peptone, 1 g CaCO<sub>3</sub>, 40 mg Fe<sub>2</sub>(SO<sub>4</sub>)<sub>3</sub>·4H<sub>2</sub>O, 100 mg KBr) and shaken at 200 rpm at 27 °C. After seven days of cultivation, sterilized XAD-7-HP resin (20 g/L) was added to absorb the organic products, and the culture and resin were shaken at 200 rpm for 2 h. The resin was filtered through cheesecloth, washed with deionized water, and eluted with acetone. The acetone-soluble fraction was dried *in vacuo* to yield 11.4 g of extract.

### Purification of N<sub>6</sub>,N<sub>6</sub>-dimethyladenosine

Crude extract (11.4g) was separated into 9 fractions by reverse phase chromatography (C18) using a stepwise gradient, with MeOH /H<sub>2</sub>O (20%-100%). The biologically active fraction (F5, 91.4mg) was further purified using an automated reversed phase chromatography (ISCO, RediSep Rf Gold® 30 g C18, 35 ml/min) using a gradient solvent system from 10%-100% MeOH:H<sub>2</sub>O over 25 min and 30 fractions (F5-I1 – F5-I30) were collected. Fractions were combined based on LC-MS profile similarity to a total of 5 fractions (F5-I1, F5-I3, F5-I5, F5-I7 and F5-I9). Biologically active F5-I7 (5.3mg) was further purified by reverse-phase HPLC (Phenomenex Luna, C18, 250 X 10.0 mm, 5  $\mu$ m, 2.5 mL/min) using a gradient solvent system, acetonitrile/water with 0.1% formic acid (10%-100%) over 20 minutes with five fractions collected. Fraction F5-I7-1 (~0.5 mg, *t*<sub>R</sub> = 7.0 min) was biologically active and used for structural characterization (HRMS and NMR), and biological assays.

## NMR characterization

High-resolution ESI-MS (HRMS) analysis of the enriched fraction **F5-I7-1** gave  $m/z$  296.1352  $[M + H]^+$  for the major metabolite consistent with a molecular formula of  $C_{12}H_{17}N_5O_4$  (calcd for  $C_{12}H_{18}N_5O_4$ , 296.1358).  $^1H$  NMR data indicated that the major metabolite was a nucleoside in nature with two aromatic signals and signals diagnostic of a glucoside. Analysis of the molecular formula and the diagnostic NMR signals suggested a structure consistent with  $N^6,N^6$ -dimethyladenosine. Due to material constraints of fraction **F5-I7-1** and the inability to get a pure sample, we ordered commercial  $N^6,N^6$ -dimethyladenosine (ChemBridge™, ChemBridge Corporation, San Diego, CA, USA) to directly compare the  $^1H$  NMR.

$^1H$  NMR comparison of commercial  $N^6,N^6$ -dimethyladenosine with the enriched fraction **F5-I7-1** indicated that the major metabolite is  $N^6,N^6$ -dimethyladenosine (Supplemental Table 1). Comparison of the aromatic H-2 at  $\delta_H$  at 8.21(s), and H-8 at  $\delta_H$  at 8.37(s), the anomeric H-1' at  $\delta_H$  at 5.90 (d,  $J = 6.0$ Hz), and remaining ribulose signals H-2' at  $\delta_H$  4.56 (ddd,  $J = 5.6, 6.0, 6.2$ ), H-3' at  $\delta_H$  4.14 (ddd,  $J = 4.8, 5.0, 6.2$ ), H-4' at  $\delta_H$  3.96 (ddd,  $J = 3.6, 3.7, 4.0$ ), H-5' at  $\delta_H$  3.67(m) and  $\delta_H$  3.55(m) with exchangeable protons 2'-OH at  $\delta_H$  5.2, 3'-OH at  $\delta_H$  5.3 and 4'-OH at  $\delta_H$  5.5 unequivocally establish the major metabolite in enriched fraction **F5-I7-1** as  $N^6,N^6$ -dimethyladenosine (Supplemental Table 1, Supplemental Figure 1-3). Analysis of the remaining  $^1H$  signals ( $\delta_H$  8.15 to  $\delta_H$  8.40 ppm and  $\delta_H$  3.50 to 6.10 ppm) in **F5-I7-1** revealed that the other metabolites are related adenosine analogs, potentially a diastereomers of  $N^6,N^6$ -dimethyladenosine.

**Supplemental Table 1.** 1D  $^1H$  NMR data for **F5-I7-1**,  $N^6,N^6$ -dimethyladenosine and adenosine.

| No.   | $\delta_H$ , mult. ( $J$ in Hz)<br><b>F5-I7-1</b> | $\delta_H$ , mult. ( $J$ in Hz)<br>$N^6,N^6$ -dimethyladenosine | $\delta_H$ , mult. ( $J$ in Hz)<br>adenosine |
|-------|---------------------------------------------------|-----------------------------------------------------------------|----------------------------------------------|
| 1     | -                                                 | -                                                               | -                                            |
| 2     | 8.21 s*                                           | 8.21 s                                                          | 8.13 s                                       |
| 3     | -                                                 | -                                                               | -                                            |
| 4     | -                                                 | -                                                               | -                                            |
| 5     | -                                                 | -                                                               | -                                            |
| 6     | -                                                 | -                                                               | -                                            |
| 7     | -                                                 | -                                                               | -                                            |
| 8     | 8.37 s*                                           | 8.37 s                                                          | 8.34 s                                       |
| 9     | -                                                 | -                                                               | -                                            |
| 1'    | 5.90 d (6.0)*                                     | 5.90 d (6.0)                                                    | 5.87 d (6.2)                                 |
| 2'    | 4.56 ddd (5.0)*                                   | 4.56 ddd (5.6, 6.0, 6.2)                                        | 4.61 ddd (5.1, 6.2, 6.3)                     |
| 3'    | 4.14 ddd (3.5)*                                   | 4.14 ddd (4.8, 5.0, 6.2)                                        | 4.14 ddd (3.0, 4.6, 5.1)                     |
| 4'    | 3.96 ddd (3.6, 3.7, 3.8)*                         | 3.96 ddd (3.6, 3.7, 4.0)                                        | 3.96 ddd (3.0, 3.6, 3.7)                     |
| 5'    | 3.67 m*                                           | 3.67 ddd (4.0, 5.0, 12.1)                                       | 3.67 ddd (3.6, 4.4, 12.1)                    |
|       | 3.55 m*                                           | 3.55 ddd (3.7, 7.0, 12.1)                                       | 3.55 ddd (3.7, 7.2, 12.1)                    |
| 2'OH  | 5.5 m*                                            | 5.46 d (6.3)                                                    | 5.43 d (6.3)                                 |
| 3'OH  | 5.2 m*                                            | 5.19 d (4.7)                                                    | 5.17 d (4.6)                                 |
| 5'OH  | 5.3 m*                                            | 5.38 dd (4.5, 7.1)                                              | 5.41 dd (4.4, 7.2)                           |
| N6-Me | 3*                                                | 3.33 s                                                          | -                                            |

\* overlap with other metabolites

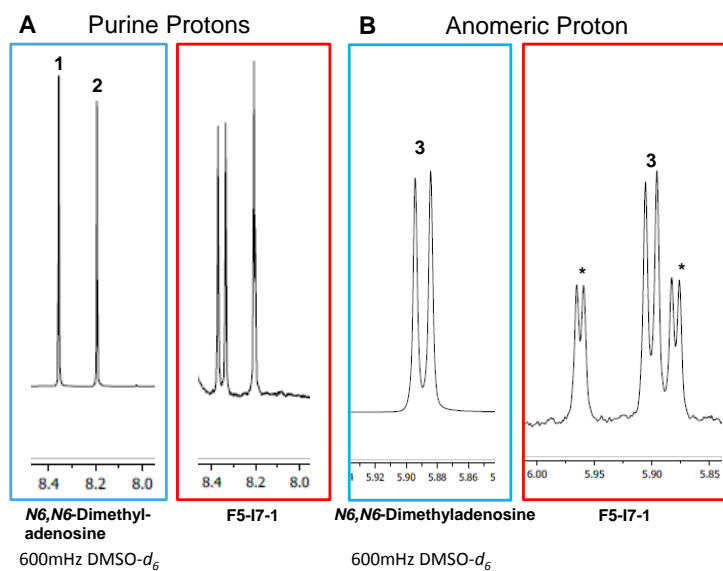

**Supplemental Figure 1.** 1D <sup>1</sup>H NMR comparison of F5-I7-1 and *N*<sup>6</sup>,*N*<sup>6</sup>-dimethyladenosine H2, H8 and H1' protons.

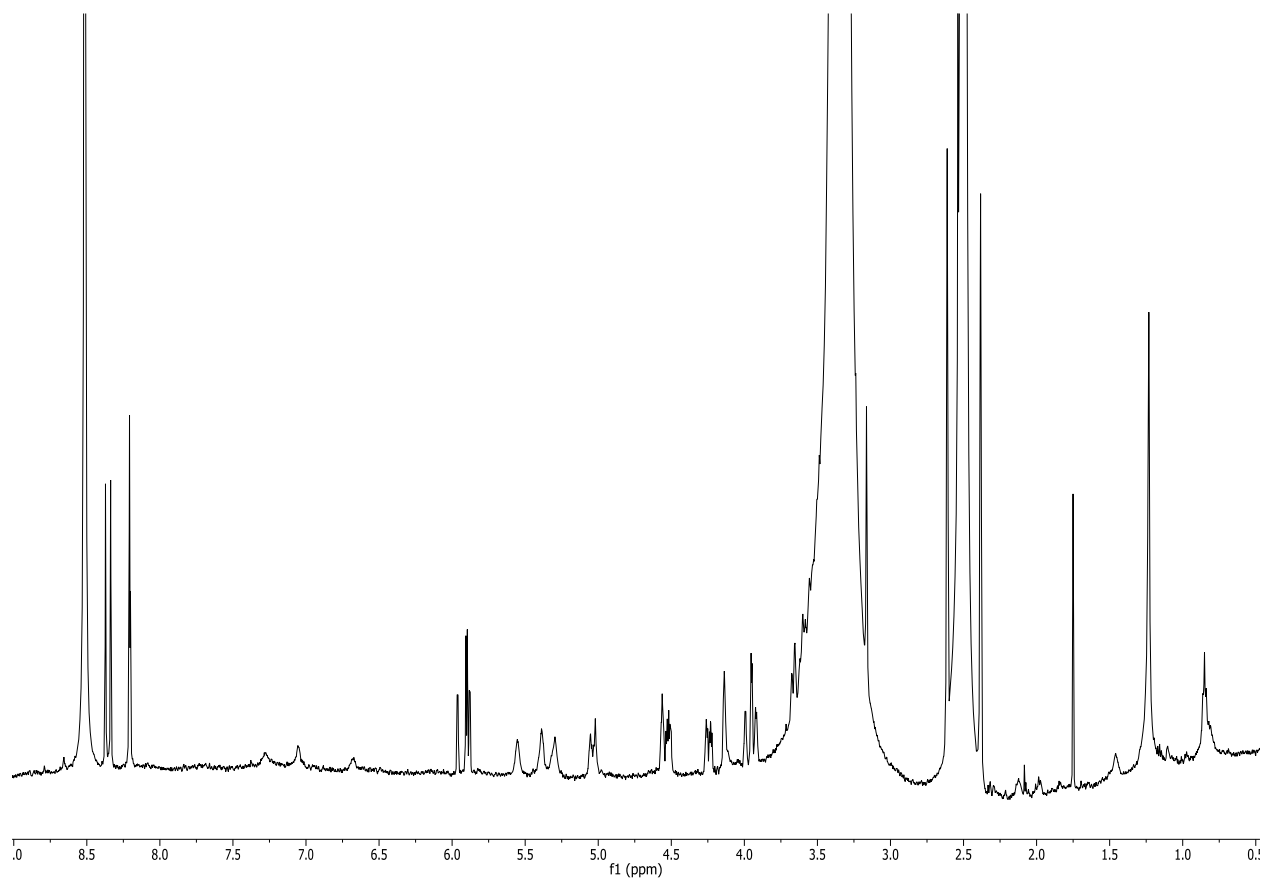

**Supplemental Figure 2.** 1D proton NMR of F5-I7-1 using 600MHz in DMSO-*d*<sub>6</sub>.

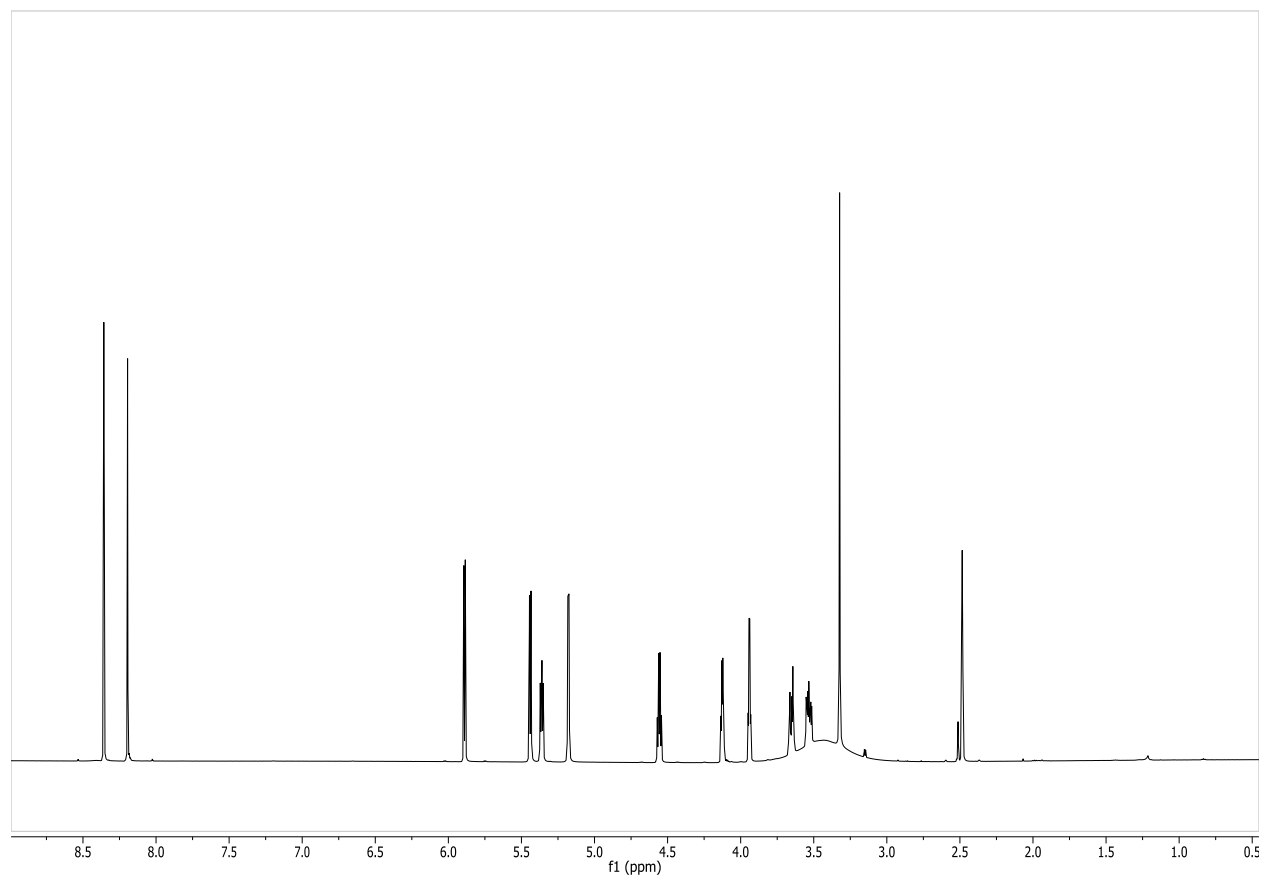

**Supplemental Figure 3.** 1D proton NMR of *N*<sup>6</sup>,*N*<sup>6</sup>-dimethyladenosine at 600MHz in DMSO-*d*<sub>6</sub>.

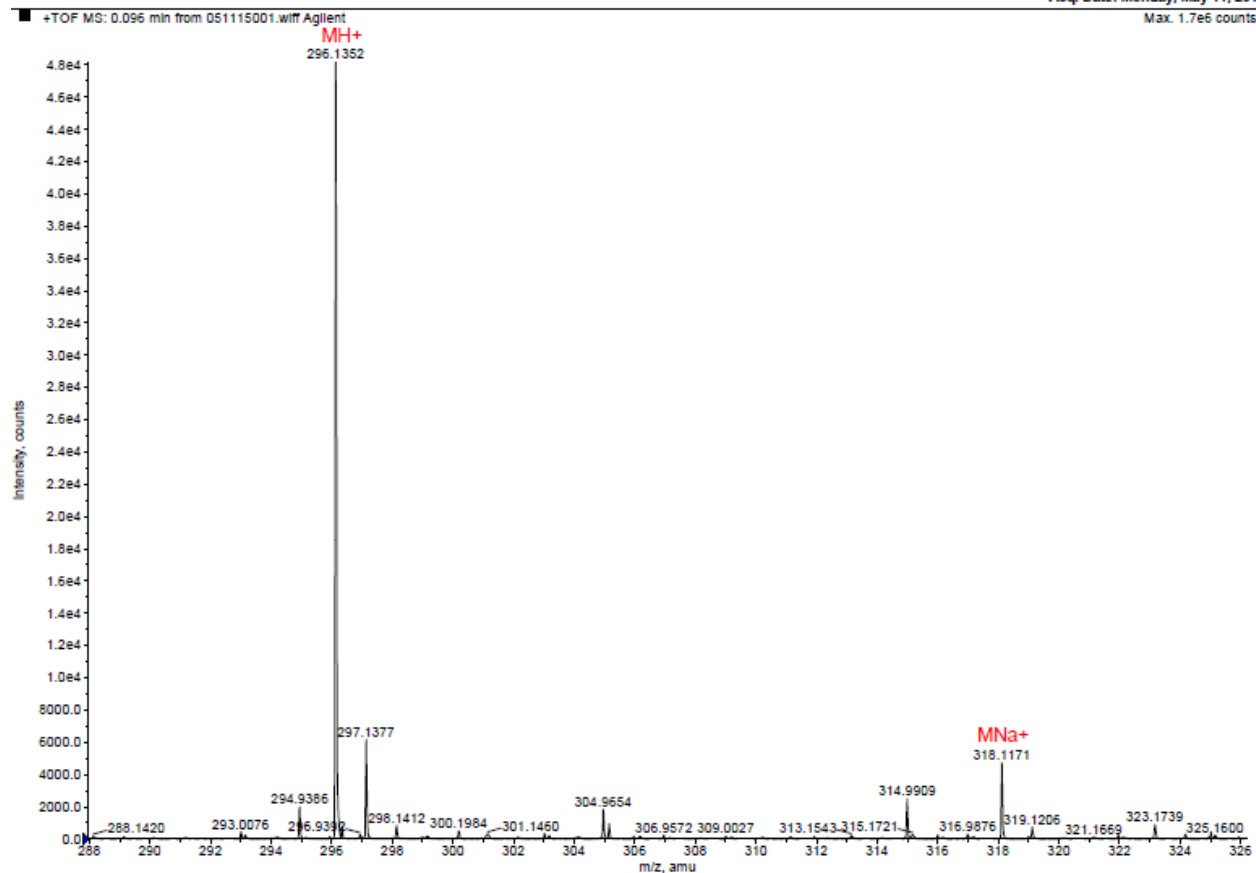

Supplemental figure 4. HRMS of F5-I7-1 showing peak at m/z 296.1352 [M + H]<sup>+</sup>.
