# Supplementary material for: FUSION-Guided Hypothesis Development Leads to the Identification of N6,N6-Dimethyladenosine, a Marine-Derived AKT Pathway Inhibitor
Source: Mar Drugs. 2017 Mar 15;15(3):75. doi: 10.3390/md15030075 (PMC5367032; doi:10.3390/md15030075)
Supplement: Supplementary file 2 [file marinedrugs-15-00075-s002.xlsx]

## Sheet: Sheet1
# Background normalized, Log2-transformed values. HCC44 cells were treated for 2.5 hours before analysis by reverse phase protein array (RPPA).
	Antibody Name	14-3-3-beta	14-3-3-epsilon	14-3-3-zeta	4E-BP1	4E-BP1_pS65	53BP1	A-Raf	ACC1	ACC_pS79	ADAR1	Akt	Akt_pS473	Akt_pT308	AMPK-a2_pS345	AMPKa	AMPKa_pT172	Annexin-I	Annexin-VII	AR	ARID1A	Atg3	Atg7	ATM	ATM_pS1981	ATRX	ATR_pS428	Aurora-B	Axl	b-Actin	b-Catenin	b-Catenin_pT41_S45	B-Raf	B-Raf_pS445	B7-H4	Bad_pS112	Bak	BAP1	Bax	Bcl-xL	Bcl2	Bcl2A1	Beclin	Bid	Bim	BiP-GRP78	BRD4	c-Abl	c-IAP2
	Gene Name	YWHAB	YWHAE	YWHAZ	EIF4EBP1	EIF4EBP1	TP53BP1	ARAF	ACACA	ACACA	ADAR	AKT1	AKT1	AKT1	PRKAA2	PRKAA1	PRKAA1	ANXA1	ANXA7	AR	ARID1A	ATG3	ATG7	ATM	ATM	ATRX	ATR	AIM1	AXL	ACTB	CTNNB1	CTNNB1	BRAF	BRAF	VTCN1	BAD	BAK1	BAP1	BAX	BCL2L1	BCL2	BCL2A1	BECN1	BID	BCL2L11	HSPA5	BRD4	ABL1	BIRC3
Sample Name	Sample Type	14-3-3-beta-R-V	14-3-3-epsilon-M-C	14-3-3-zeta-R-V	4E-BP1-R-V	4E-BP1_pS65-R-V	53BP1-R-V	A-Raf-R-V	ACC1-R-C	ACC_pS79-R-V	ADAR1-M-V	Akt-R-V	Akt_pS473-R-V	Akt_pT308-R-V	AMPK-a2_pS345-R-V	AMPKa-R-C	AMPKa_pT172-R-C	Annexin-I-M-V	Annexin-VII-M-V	AR-R-V	ARID1A-R-C	Atg3-R-V	Atg7-R-V	ATM-R-V	ATM_pS1981-R-V	ATRX-R-C	ATR_pS428-R-C	Aurora-B-R-V	Axl-R-V	b-Actin-R-C	b-Catenin-R-V	b-Catenin_pT41_S45-R-V	B-Raf-R-V	B-Raf_pS445-R-V	B7-H4-R-C	Bad_pS112-R-V	Bak-R-C	BAP1-M-V	Bax-R-V	Bcl-xL-R-V	Bcl2-M-V	Bcl2A1-R-V	Beclin-G-C	Bid-R-C	Bim-R-V	BiP-GRP78-M-C	BRD4-R-V	c-Abl-R-V	c-IAP2-R-C
DMSO_1	HCC44	0.0828262	0.340605	0.0771229	-0.0676971	0.347229	-0.144562	-0.0590588	-0.0665361	0	0.135645	-0.0029858	0.0105324	0	-0.0190374	-0.179655	0	0.139283	-0.0481748	-0.093846	-0.0601495	0.0612668	-0.011421	-0.0195854	0.00165362	-0.00684977	0.181502	0.0347542	0.167593	0	0	-0.225372	0.0068537	0.00436152	0.244458	-0.0558811	0	-0.040451	0.0183164	0	0	-0.0216845	-0.0280279	0	-0.00422254	0	-0.0160832	-0.0245584	0.104445
DMSO_2	HCC44	0.264793	-0.128704	-0.162659	-0.208564	0.250901	-0.064729	0.348378	-0.0690535	-0.303668	0.0729529	-0.100043	-0.0158913	0.26672	0.239661	0.108697	-0.265695	-0.0469103	0.127871	0.142323	-0.192395	-0.16079	-0.07191	-0.00980862	0.0889881	-0.192877	0.252331	0.594693	0.0269337	-0.124953	-0.303668	0.0897503	0.324622	0.0316706	0.229957	1.28726	0.0322111	-0.049686	-0.0397742	0.481502	-0.191902	0.287513	-0.266019	-0.238808	-0.0636475	0.158715	-0.137919	0.0126032	0.139427
N6,N6-dimethyladenosine (10 uM)_1	HCC44	0.0530234	-0.000712816	0.0938679	-0.33452	-0.121969	-0.258559	0.0776485	0.108496	0.136707	-0.0179579	-0.331979	-1.33097	0.136707	-0.245352	-0.409006	0.136707	-0.0949866	-0.0274574	-0.0473556	-0.101738	0.0715895	0.0554865	0.00652723	-0.133953	-0.11662	-0.441048	0.0981961	-0.159976	0.136707	0.136707	0.172948	0.129821	0.132333	0.224756	0.168365	0.136707	0.0243674	0.073738	0.136707	0.136707	0.115023	0.108679	0.136707	-0.0901419	0.136707	-0.0330617	-0.190952	0.0142617
N6,N6-dimethyladenosine (10 uM)_2	HCC44	-0.0707805	-0.0434262	-0.0288625	-0.178513	0.0348168	-0.175994	-0.0269336	0.0298239	0.0129035	-0.0745684	-0.283841	-1.25987	0.0129035	-0.318456	0.0658872	0.0129035	0.0181984	-0.0267243	-0.24108	0.0171874	-0.051081	0.0242349	0.0258185	-0.0521426	0.0197209	-0.135492	-0.0385285	-0.272491	0.0129035	0.0129035	-0.157889	-0.26999	0.00852877	-0.0941369	-0.0165179	0.0129035	-0.0173285	-0.00564843	0.0129035	0.0414431	0.436343	0.275437	0.0129035	0.0171137	0.0129035	0.0111449	-0.0961968	-0.0996967
N6,N6-dimethyladenosine (1 uM)_1	HCC44	0.10075	0.122749	0.109127	-0.292238	0.017109	-0.162575	0.00947777	-0.294151	0.0685366	0.0157196	-0.306727	-0.681087	0.0685366	-0.237118	-0.356275	0.0685366	-0.33106	-0.185523	0.0963754	0.107768	0.158834	-0.156657	-0.244583	0.0668811	-0.124695	-0.139816	0.0244925	0.073945	0.0685366	0.0685366	-0.398684	-0.070091	0.12139	-0.291928	-0.0158434	0.0685366	-0.00499524	-0.000276861	0.0685366	0.0685366	0.0468521	0.0405087	0.0685366	-0.0524414	0.0685366	0.0174783	0.0384904	-0.165375
N6,N6-dimethyladenosine (1 uM)_2	HCC44	-0.00942556	-0.0326011	0.031419	-0.491524	0.0520071	-0.0665716	0.113025	-0.0328101	0.0742584	0.0458707	-0.271185	-1.05278	0.0742584	0.0250423	-0.104387	0.0742584	-0.0941577	-0.214085	7.48044e-05	0.0699618	0.00914062	0.00296766	-0.23933	0.0518484	0.162519	-0.155439	-0.0530959	-0.0014027	0.0742584	0.0742584	-0.108491	-0.209838	0.0698837	-0.286206	-0.0241156	0.0742584	0.238964	0.0255342	0.0742584	0.0742584	0.0525739	0.0462305	0.0742584	0.000273129	0.0742584	0.140825	0.0888608	-0.236855
staurosporine (100 nM)_1	HCC44	-0.169957	0.0396752	0.284654	0.248811	-0.24827	0.101839	0.286002	-0.0966111	-0.143779	0.284221	0.205206	0.693458	-0.143779	0.167962	-0.0821656	-0.143779	0.308335	0.311345	0.163416	-0.0483158	0.257445	0.0292858	-0.082107	0.219344	0.0162634	0.0843312	-0.0332846	0.106393	-0.0192508	-0.143779	0.18085	0.217432	-0.148154	0.436375	-0.242153	0.0523863	0.112026	-0.0459325	0.159542	-0.143779	-0.0916358	0.113859	-0.143779	0.19553	0.495469	0.0835953	-0.0497332	0.0309751
staurosporine (100 nM)_2	HCC44	-0.00862251	-0.208259	-0.0428394	0.0646623	-0.375877	0.128297	-0.0590588	-0.0171212	0	-0.0997627	0.130959	0.798943	0	0.106012	-0.055004	0	-0.116647	0.0385684	-0.0283865	-0.246241	-0.0651178	-0.127907	0.0708844	0.173727	-0.061951	-0.0427646	0.031695	-0.00542879	0	0	-0.0371748	-0.261727	-0.00437475	0.194079	0.0288334	0	0.0296115	-0.162058	0	0	-0.0216845	-0.0280279	0	0.0514149	0.331954	-0.0411351	-0.0119622	-0.198963
[truncated: 256 more columns]
